# Supplementary material
Source: PubMed Central journal article supplement (PMC3883848)
Supplement: supp_130952_sleep-topfner-1-at.pdf [file supp_130952_sleep-topfner-1-at.pdf]

## Appendix 1 (as supplied by the authors): Literature search

We conducted a comprehensive literature search for peer-reviewed studies on the diagnosis and of sleep disordered breathing in adults. The search included the following databases: PubMed (MEDLINE and non-MEDLINE sources), The Cochrane Library, the Centre for Reviews and Dissemination (DARE, NHS EED and HTA databases), EMBASE, PsycINFO, CINAHL, and Web of Science. The search strategy combined Medical Subject Headings (MeSH), such as Sleep Apnea Syndromes/Diagnosis, Cheyne-Stokes Respiration/Diagnosis, and Polysomnography, and other controlled vocabulary terms, with additional keywords (such as “sleep related breathing disorder\*” and “upper airway resistance”). The search was limited to English language studies published in the most recent 5 years (2007 to March 2012), with monthly update searches from PubMed throughout the project (until March 2013). Earlier studies, identified in a 2010 systematic review conducted by our research group, were also included if they met the inclusion criteria, consequently, the date range of the search extended from 2004 to 2013.

To identify grey literature relevant websites were searched for clinical practice guidelines and health technology assessments. The reference lists of published papers and contact with clinical experts were used to identify further sources. Reference Manager (v. 12) bibliographic software was used to collect the search results and remove duplicate citations. Full details of the searches are shown below.

1a. PubMed ([www.pubmed.gov](http://www.pubmed.gov); first searched 5 Mar 2012; monthly updates run throughout the project until March 2013)

|            |                                                                                                                               |                |
|------------|-------------------------------------------------------------------------------------------------------------------------------|----------------|
| <u>#98</u> | Search #95 OR #97                                                                                                             | <u>3928</u>    |
| <u>#97</u> | Search #94 Limits: English, Publication Date from 2007 to 2012                                                                | <u>3924</u>    |
| <u>#96</u> | Search Limits: English, Publication Date from 2007 to 2012                                                                    | <u>3846363</u> |
| <u>#95</u> | Search #94 AND (in process[sb] OR publisher[sb] OR pubmednotmedline[sb])<br>Limits: Publication Date from 2007 to 2012        | <u>59</u>      |
| <u>#94</u> | Search #55 OR #92 Limits: Publication Date from 2007 to 2012                                                                  | <u>4446</u>    |
| <u>#93</u> | Search #55 OR #92                                                                                                             | <u>13650</u>   |
| <u>#92</u> | Search #73 AND #91                                                                                                            | <u>11647</u>   |
| <u>#91</u> | Search #74 OR #75 OR #76 OR #77 OR #78 OR #79 OR #80 OR #81 OR #82<br>OR #83 OR #84 OR #85 OR #86 OR #87 OR #88 OR #89 OR #90 | <u>7658170</u> |
| <u>#90</u> | Search CPAP[ti] AND (diagnosis[mh] OR diagnosis[ti] OR diagnosis[sh])                                                         | <u>634</u>     |
| <u>#89</u> | Search continuous positive airway pressure[mh] AND (diagnosis[mh] OR<br>diagnosis[ti] OR diagnosis[sh])                       | <u>1951</u>    |
| <u>#88</u> | Search "cardiopulmonary monitor*" [ti]                                                                                        | <u>2</u>       |
| <u>#87</u> | Search (level[ti] OR type[ti]) AND sleep[ti]                                                                                  | <u>431</u>     |
| <u>#86</u> | Search "cardio-respiratory monitor*" [ti] OR "cardiorespiratory monitor*" [ti]                                                | <u>6</u>       |
| <u>#85</u> | Search portable[ti] AND sleep[ti]                                                                                             | <u>85</u>      |
| <u>#84</u> | Search ambulatory care[mh]                                                                                                    | <u>42145</u>   |

|                     |                                                                                                                     |                         |
|---------------------|---------------------------------------------------------------------------------------------------------------------|-------------------------|
| <a href="#">#83</a> | Search monitoring, ambulatory[mh]                                                                                   | <a href="#">18622</a>   |
| <a href="#">#82</a> | Search reproducibility of results[mh]                                                                               | <a href="#">224075</a>  |
| <a href="#">#81</a> | Search predictive value of tests[mh]                                                                                | <a href="#">116418</a>  |
| <a href="#">#80</a> | Search sensitivity and specificity[mh]                                                                              | <a href="#">346719</a>  |
| <a href="#">#79</a> | Search diagnosis[ti] OR diagnosing[ti]                                                                              | <a href="#">295159</a>  |
| <a href="#">#78</a> | Search diagnosis[mh]                                                                                                | <a href="#">5816614</a> |
| <a href="#">#77</a> | Search diagnosis[sh]                                                                                                | <a href="#">3913314</a> |
| <a href="#">#76</a> | Search polysomnograph*[ti]                                                                                          | <a href="#">1081</a>    |
| <a href="#">#75</a> | Search polysomnography[mh]                                                                                          | <a href="#">11502</a>   |
| <a href="#">#74</a> | Search "sleep study"[ti] OR "sleep studies"[ti]                                                                     | <a href="#">258</a>     |
| <a href="#">#73</a> | Search #56 OR #57 OR #58 OR #59 OR #60 OR #61 OR #62 OR #63 OR #64 OR #65 OR #66 OR #67 OR #69 OR #70 OR #71 OR #72 | <a href="#">17054</a>   |
| <a href="#">#72</a> | Search "sleep related hypoxemia"[ti]                                                                                | <a href="#">2</a>       |
| <a href="#">#71</a> | Search OSA[ti]                                                                                                      | <a href="#">301</a>     |
| <a href="#">#70</a> | Search apnea*[ti] OR apnoea*[ti]                                                                                    | <a href="#">14346</a>   |
| <a href="#">#69</a> | Search "nocturnal bronchial constriction"[ti]                                                                       | <a href="#">0</a>       |
| <a href="#">#67</a> | Search "nocturnal bronchospasm"[ti]                                                                                 | <a href="#">2</a>       |
| <a href="#">#66</a> | Search "nocturnal hypoxia"[ti]                                                                                      | <a href="#">37</a>      |
| <a href="#">#65</a> | Search "cheyne stokes"[ti]                                                                                          | <a href="#">274</a>     |
| <a href="#">#64</a> | Search "hypopnea syndrome*[ti]                                                                                      | <a href="#">603</a>     |
| <a href="#">#63</a> | Search "alveolar hypoventilation"[ti]                                                                               | <a href="#">275</a>     |
| <a href="#">#62</a> | Search uars[ti]                                                                                                     | <a href="#">11</a>      |
| <a href="#">#61</a> | Search "upper airway resistance syndrome"[ti]                                                                       | <a href="#">73</a>      |
| <a href="#">#60</a> | Search "periodic breathing"[ti]                                                                                     | <a href="#">217</a>     |
| <a href="#">#59</a> | Search "sleep related hypoventilation"[ti]                                                                          | <a href="#">3</a>       |
| <a href="#">#58</a> | Search breathing[ti] AND "sleep disorder*[ti]                                                                       | <a href="#">2</a>       |
| <a href="#">#57</a> | Search "sleep disordered breathing"[ti]                                                                             | <a href="#">1469</a>    |
| <a href="#">#56</a> | Search "sleep related breathing"[ti]                                                                                | <a href="#">285</a>     |
| <a href="#">#55</a> | Search #51 OR #52 OR #53 OR #54                                                                                     | <a href="#">6885</a>    |
| <a href="#">#54</a> | Search cheyne-stokes respiration/di                                                                                 | <a href="#">106</a>     |
| <a href="#">#53</a> | Search sleep apnea, central/di                                                                                      | <a href="#">239</a>     |

|                     |                                    |                      |
|---------------------|------------------------------------|----------------------|
| <a href="#">#52</a> | Search sleep apnea, obstructive/di | <a href="#">3236</a> |
| <a href="#">#51</a> | Search sleep apnea syndromes/di    | <a href="#">6833</a> |

1b. PubMed ([www.pubmed.gov](http://www.pubmed.gov); search refinement to re-examine excluded studies for association or risk factor studies of polysomnography for sleep disordered breathing conditions, i.e., original search strategy plus additional keywords and publication types)

|                      |                                                                                                                                                                                                                                                                                                                                                                                                                                                                                                                                                                                                                                                                                                                                                                                                                                                                                                                                                                                                                                                                                                                                                                                                                                                                                                                                                                                                                                                                                                                                                                                                                                                                                                                                                                                                                                                                                                                                                                                                                                                                                                                                               |                     |
|----------------------|-----------------------------------------------------------------------------------------------------------------------------------------------------------------------------------------------------------------------------------------------------------------------------------------------------------------------------------------------------------------------------------------------------------------------------------------------------------------------------------------------------------------------------------------------------------------------------------------------------------------------------------------------------------------------------------------------------------------------------------------------------------------------------------------------------------------------------------------------------------------------------------------------------------------------------------------------------------------------------------------------------------------------------------------------------------------------------------------------------------------------------------------------------------------------------------------------------------------------------------------------------------------------------------------------------------------------------------------------------------------------------------------------------------------------------------------------------------------------------------------------------------------------------------------------------------------------------------------------------------------------------------------------------------------------------------------------------------------------------------------------------------------------------------------------------------------------------------------------------------------------------------------------------------------------------------------------------------------------------------------------------------------------------------------------------------------------------------------------------------------------------------------------|---------------------|
| <a href="#">#144</a> | Search #125 OR #138 OR #143                                                                                                                                                                                                                                                                                                                                                                                                                                                                                                                                                                                                                                                                                                                                                                                                                                                                                                                                                                                                                                                                                                                                                                                                                                                                                                                                                                                                                                                                                                                                                                                                                                                                                                                                                                                                                                                                                                                                                                                                                                                                                                                   | <a href="#">935</a> |
| <a href="#">#143</a> | Search #124 AND (association[mh] OR association[ti] OR relationship*[ti] OR risk factors[mh] OR risk factor*[ti]) Filters: published in the last 5 years; English; Adult: 19+ years                                                                                                                                                                                                                                                                                                                                                                                                                                                                                                                                                                                                                                                                                                                                                                                                                                                                                                                                                                                                                                                                                                                                                                                                                                                                                                                                                                                                                                                                                                                                                                                                                                                                                                                                                                                                                                                                                                                                                           | <a href="#">517</a> |
| <a href="#">#138</a> | Search #124 Filters: published in the last 5 years; Humans; Evaluation Studies; Guideline; Multicenter Study; Practice Guideline; Review; Systematic Reviews; Meta-Analysis; Validation Studies; English; Adult: 19+ years                                                                                                                                                                                                                                                                                                                                                                                                                                                                                                                                                                                                                                                                                                                                                                                                                                                                                                                                                                                                                                                                                                                                                                                                                                                                                                                                                                                                                                                                                                                                                                                                                                                                                                                                                                                                                                                                                                                    | <a href="#">307</a> |
| <a href="#">#125</a> | Search #124 AND (in process[sb] OR publisher[sb] OR pubmednotmedline[sb] OR systematic[sb])                                                                                                                                                                                                                                                                                                                                                                                                                                                                                                                                                                                                                                                                                                                                                                                                                                                                                                                                                                                                                                                                                                                                                                                                                                                                                                                                                                                                                                                                                                                                                                                                                                                                                                                                                                                                                                                                                                                                                                                                                                                   | <a href="#">221</a> |
| <a href="#">#124</a> | Search (((sleep apnea syndromes/di) OR (sleep apnea, obstructive/di) OR (sleep apnea, central/di) OR (cheyne-stokes respiration/di)) OR (("sleep related breathing"[ti] OR ("sleep disordered breathing"[ti] OR (breathing[ti] AND "sleep disorder*" [ti]) OR ("sleep related hypoventilation"[ti] OR ("periodic breathing"[ti] OR ("upper airway resistance syndrome"[ti] OR (uars[ti] OR ("alveolar hypoventilation"[ti] OR ("hypopnea syndrome*" [ti]) OR ("cheyne stokes"[ti] OR ("nocturnal hypoxia"[ti] OR ("nocturnal bronchospasm"[ti] OR ("nocturnal bronchial constriction"[ti] OR (apnea*[ti] OR apnoea*[ti] OR (OSA[ti] OR ("sleep related hypoxemia"[ti])) AND (("sleep study"[ti] OR "sleep studies"[ti] OR (polysomnography[mh] OR (polysomnograph*[ti] OR (diagnosis[sh] OR (diagnosis[mh] OR (diagnosis[ti] OR diagnosing[ti] OR (sensitivity and specificity[mh] OR (predictive value of tests[mh] OR (reproducibility of results[mh] OR (monitoring, ambulatory[mh] OR (ambulatory care[mh] OR (portable[ti] AND sleep[ti] OR ("cardio-respiratory monitor*" [ti] OR "cardiorespiratory monitor*" [ti] OR ((level[ti] OR type[ti]) AND sleep[ti]) OR ("cardiopulmonary monitor*" [ti] OR (continuous positive airway pressure[mh] AND (diagnosis[mh] OR diagnosis[ti] OR diagnosis[sh])) OR (CPAP[ti] AND (diagnosis[mh] OR diagnosis[ti] OR diagnosis[sh]))) AND (("2007"[PDat] : "2012"[PDat]))) AND (in process[sb] OR publisher[sb] OR pubmednotmedline[sb]) AND (("2007"[PDat] : "2012"[PDat]))) OR (((sleep apnea syndromes/di) OR (sleep apnea, obstructive/di) OR (sleep apnea, central/di) OR (cheyne-stokes respiration/di)) OR (("sleep related breathing"[ti] OR ("sleep disordered breathing"[ti] OR (breathing[ti] AND "sleep disorder*" [ti]) OR ("sleep related hypoventilation"[ti] OR ("periodic breathing"[ti] OR ("upper airway resistance syndrome"[ti] OR (uars[ti] OR ("alveolar hypoventilation"[ti] OR ("hypopnea syndrome*" [ti]) OR ("cheyne stokes"[ti] OR ("nocturnal hypoxia"[ti] OR ("nocturnal bronchospasm"[ti] OR ("nocturnal bronchial constriction"[ti] OR (apnea*[ti] OR apnoea*[ti]) |                     |

OR (OSA[ti] OR ("sleep related hypoxemia"[ti])) AND (("sleep study"[ti] OR "sleep studies"[ti] OR (polysomnography[mh] OR (polysomnograph\*[ti] OR (diagnosis[sh] OR (diagnosis[mh] OR (diagnosis[ti] OR diagnosing[ti] OR (sensitivity and specificity[mh] OR (predictive value of tests[mh] OR (reproducibility of results[mh] OR (monitoring, ambulatory[mh] OR (ambulatory care[mh] OR (portable[ti] AND sleep[ti] OR ("cardio-respiratory monitor\*[ti] OR "cardiorespiratory monitor\*[ti] OR ((level[ti] OR type[ti]) AND sleep[ti]) OR ("cardiopulmonary monitor\*[ti] OR (continuous positive airway pressure[mh] AND (diagnosis[mh] OR diagnosis[ti] OR diagnosis[sh]))) OR (CPAP[ti] AND (diagnosis[mh] OR diagnosis[ti] OR diagnosis[sh]))) AND (("2007"[PDat] : "2012"[PDat]))) AND (English[lang] AND ("2007"[PDat] : "2012"[PDat])))

2. Centre for Reviews & Dissemination (DARE, HTA, NHS EED) databases

<http://www.crd.york.ac.uk/crdweb/HomePage.asp>; searched 6 Mar 2012

|    |                                                                                                                                  |      |
|----|----------------------------------------------------------------------------------------------------------------------------------|------|
| 1  | MeSH DESCRIPTOR Sleep Apnea Syndromes EXPLODE ALL TREES                                                                          | 128  |
| 2  | MeSH DESCRIPTOR Sleep Apnea, Obstructive EXPLODE ALL TREES                                                                       | 87   |
| 3  | MeSH DESCRIPTOR Sleep Apnea, Central EXPLODE ALL TREES                                                                           | 1    |
| 4  | MeSH DESCRIPTOR Cheyne-Stokes Respiration EXPLODE ALL TREES                                                                      | 0    |
| 5  | ("sleep related breathing") OR (hypoventilation) OR ("sleep disorder*") OR ("periodic breathing") OR ("upper airway resistance") | 26   |
| 6  | (uars) OR ("alveolar hypoventilation") OR ("hypopnea syndrome*") OR ("cheyne stokes") OR ("nocturnal hypoxia")                   | 14   |
| 7  | ("nocturnal bronchospasm") OR ("nocturnal bronchial construction") OR (apnea*) OR (apnoea*) OR (osa)                             | 225  |
| 8  | ("sleep related hypoxemia")                                                                                                      | 0    |
| 9  | #5 OR #6 OR #7 OR #8                                                                                                             | 242  |
| 10 | ("sleep stud*") OR (polysomnography) OR (polysomnograph*) OR (diagnosis) OR (diagnosing)                                         | 8338 |
| 11 | MeSH DESCRIPTOR Sensitivity and Specificity EXPLODE ALL TREES                                                                    | 2726 |
| 12 | MeSH DESCRIPTOR Predictive Value of Tests EXPLODE ALL TREES                                                                      | 667  |
| 13 | MeSH DESCRIPTOR Reproducibility of Results EXPLODE ALL TREES                                                                     | 560  |
| 14 | MeSH DESCRIPTOR Monitoring, Ambulatory EXPLODE ALL TREES                                                                         | 109  |
| 15 | MeSH DESCRIPTOR Ambulatory Care EXPLODE ALL TREES                                                                                | 341  |
| 16 | (portable AND sleep) OR ("cardio-respiratory monitor*") OR ("cardiorespiratory                                                   | 183  |

|    |                                                                              |       |
|----|------------------------------------------------------------------------------|-------|
|    | monitor*") OR ((level OR type) AND sleep) OR ("cardiopulmonary monitor*"):AU |       |
| 17 | MeSH DESCRIPTOR Continuous Positive Airway Pressure EXPLODE ALL TREES        | 44    |
| 18 | (cpap)                                                                       | 72    |
| 19 | #17 OR #18                                                                   | 100   |
| 20 | diagnosis                                                                    | 8232  |
| 21 | #19 AND #20                                                                  | 24    |
| 22 | #1 OR #2 OR #3 OR #4 OR #21                                                  | 132   |
| 23 | #10 OR #11 OR #12 OR #13 OR #14 OR #15 OR #16                                | 10002 |
| 24 | #9 AND #23                                                                   | 108   |
| 25 | #22 OR #24                                                                   | 167   |
| 26 | * FROM 2007 TO 2012                                                          | 22779 |
| 27 | #25 AND #26                                                                  | 84    |

### 3. The Cochrane Library (John Wiley & Sons, issue 2 of 12, February 2012)

|     |                                                                                                                                                                              |       |
|-----|------------------------------------------------------------------------------------------------------------------------------------------------------------------------------|-------|
| #1  | MeSH descriptor Sleep Apnea Syndromes explode all trees                                                                                                                      | 1041  |
| #2  | MeSH descriptor Sleep Apnea, Obstructive explode all trees                                                                                                                   | 604   |
| #3  | MeSH descriptor Sleep Apnea, Central explode all trees                                                                                                                       | 22    |
| #4  | MeSH descriptor Cheyne-Stokes Respiration explode all trees                                                                                                                  | 28    |
| #5  | (( #1 OR #2 OR #3 OR #4 ) AND ( diagnosis OR polysomnograph* )), from 2007 to 2012                                                                                           | 253   |
| #6  | "sleep related breathing" or "sleep disordered breathing" or "periodic breathing" or "upper airway resistance" or (uars)                                                     | 351   |
| #7  | "alveolar hypoventilation" or "hypopnea syndrome*" or "cheyne stokes" or "nocturnal hypoxia" or "nocturnal bronchospasm"                                                     | 220   |
| #8  | "nocturnal bronchial constriction" or (apnea*) or (apnoea*) or (OSA) or "sleep related hypoxemia"                                                                            | 3127  |
| #9  | (#6 OR #7 OR #8), from 2007 to 2012                                                                                                                                          | 1210  |
| #10 | "sleep study" or "sleep studies" or (polysomnography) or (polysomnograph):ti,ab,kw                                                                                           | 1653  |
| #11 | (sensitivity and specificity):ti,ab,kw or (predictive value of tests) or (reproducibility of results):ti,ab,kw or (monitoring, ambulatory):ti,ab,kw or (ambulatory):ti,ab,kw | 57224 |
| #12 | (portable):ti,ab,kw or (continuous positive airway pressure):ti,ab,kw and                                                                                                    | 1549  |

|                                                       |       |
|-------------------------------------------------------|-------|
| (cpap):ti,ab,kw                                       |       |
| #13 (#9 AND ( #10 OR #11 OR #12 )), from 2007 to 2012 | 506   |
| #14 (#5 OR #13), from 2007 to 2012                    | 529   |
| #15 (diagnosis):ti,ab,kw                              | 49505 |
| #16 (#14 AND #15), from 2007 to 2012                  | 151   |

4. EMBASE (OvidSP; 1980 to 2012 Week 09)

|                                                                                     |         |
|-------------------------------------------------------------------------------------|---------|
| 1 exp sleep disordered breathing/di [Diagnosis]                                     | 6246    |
| 2 exp sleep apnea syndrome/di [Diagnosis]                                           | 5859    |
| 3 exp central sleep apnea syndrome/di [Diagnosis]                                   | 135     |
| 4 exp upper airway resistance syndrome/di [Diagnosis]                               | 36      |
| 5 exp Cheyne Stokes breathing/di [Diagnosis]                                        | 93      |
| 6 exp upper airway resistance syndrome/di [Diagnosis]                               | 36      |
| 7 exp lung alveolus hypoventilation/di [Diagnosis]                                  | 52      |
| 8 1 or 2 or 3 or 4 or 5 or 6 or 7                                                   | 6333    |
| 9 exp polysomnography/                                                              | 15601   |
| 10 exp diagnosis/                                                                   | 3792514 |
| 11 exp "sensitivity and specificity"/                                               | 151799  |
| 12 exp predictive value/                                                            | 13348   |
| 13 exp reproducibility/                                                             | 114633  |
| 14 exp ambulatory monitoring/                                                       | 7598    |
| 15 exp ambulatory care/                                                             | 32904   |
| 16 (portable and sleep).ti.                                                         | 122     |
| 17 (cardio-respiratory monitor or cardiorespiratory monitor*).ti.                   | 38      |
| 18 ((level or type) and sleep).ti.                                                  | 554     |
| 19 continuous positive airway pressure.mp. or exp positive end expiratory pressure/ | 26928   |
| 20 cpap.ti.                                                                         | 1613    |
| 21 19 or 20                                                                         | 26988   |
| 22 10 and 21                                                                        | 7332    |
| 23 9 or 10 or 11 or 12 or 13 or 14 or 15 or 16 or 17 or 18                          | 3960950 |
| 24 22 or 23                                                                         | 3960950 |
| 25 8 and 24                                                                         | 4581    |
| 26 limit 25 to (english language and yr="2007 -Current")                            | 1351    |

5. CINAHL (EbscoHost; 7 Mar 2012)

|                                                                      |     |
|----------------------------------------------------------------------|-----|
| S7 S1 or S2 or S3 or S4                                              | 181 |
| Limiters - English Language; Published Date from: 20070101-20121231; |     |

Exclude MEDLINE records

|    |                                    |      |
|----|------------------------------------|------|
| S6 | S1 or S2 or S3 or S4               | 1611 |
| S5 | S1 or S2 or S3 or S4               | 1611 |
| S4 | cheyne stokes                      | 84   |
| S3 | (MH "Sleep Apnea, Central/DI")     | 56   |
| S2 | (MH "Sleep Apnea, Obstructive/DI") | 703  |
| S1 | (MH "Sleep Apnea Syndromes+/DI")   | 1543 |

6. PsycINFO (OvidSP; 2002 to February Week 4 2012)

|   |                                                     |     |
|---|-----------------------------------------------------|-----|
| 1 | exp Polysomnography/                                | 597 |
| 2 | limit 1 to (english language and yr="2007-Current") | 398 |

7. Web of Science (Thomson Reuters; 8 Mar 2012)

Title=("sleep apnea\*" OR "cheyne-stokes" OR "sleep related breathing" OR "upper airway resistance" OR "alveolar hypoventilation" OR "hypopnea syndrome" OR "nocturnal hypoxia" OR "nocturnal bronchospasm" OR "sleep related hypoxmia") AND Title=(diagnosis\* OR polysomnograph\*)  
Timespan=2007-2012. Databases=SCI-EXPANDED, SSCI, A&HCI, CPCI-S, CPCI-SSH, BKCI-S, BKCI-SSH.

= 166 references

**Grey literature** (search completed June 2012; \*search terms used)

#### *Guidelines*

- Canadian Medical Association CMA Infobase

[http://www.cma.ca/index.php?la\\_id=1&ci\\_id=54294&keywords=barrett](http://www.cma.ca/index.php?la_id=1&ci_id=54294&keywords=barrett) \*sleep / polysomnography

- Ontario Guidelines Advisory Committee (GAC) <http://www.gacguidelines.ca/> \*scanned archived guidelines

- Alberta Medical Association Towards Optimized Practice (TOP) <http://www.topalbertadoctors.org/> \*sleep / polysomnography

- BC Ministry of Health Guidelines & Protocols Advisory Committee

<http://www.bcguidelines.ca/gpac/alphabetical.html> \*scanned list of guidelines

- Aetna Clinical Policy Bulletins [http://www.aetna.com/healthcare-professionals/policies-guidelines/medical\\_clinical\\_policy\\_bulletins.html](http://www.aetna.com/healthcare-professionals/policies-guidelines/medical_clinical_policy_bulletins.html) \*sleep / polysomnography

- National Guideline Clearinghouse <http://www.guidelines.gov> \*sleep apnea syndromes

- New Zealand Guidelines Group <http://www.nzgg.org.nz/> \*sleep

- National Institute for Health and Clinical Excellence (NICE) <http://www.nice.org.uk> \*sleep

- Scottish Intercollegiate Guidelines Network (SIGN)

<http://www.sign.ac.uk/guidelines/published/index.html> \*scanned list of guidelines

#### *Clinical trials*

- ClinicalTrials.gov <http://www.clinicaltrials.gov> \*(sleep disordered breathing OR sleep apnea syndromes) AND diagnosis | Adult, Senior received from 01/01/2007 to 05/29/2012 | updated from 01/01/2007 to 05/29/2012

#### *Health Technology Assessment agency web sites*

Appendix to: El Shayeb M, Topfer LA, Stafinski T, et al. A comparison of level 3 portable sleep tests to level 1 polysomnography in the diagnosis of sleep-disordered breathing: a systematic review and meta-analysis. *CMAJ* 2013; DOI:10.1503/cmaj.130952.

Copyright © 2013 Canadian Medical Association or its licensors

## Canada

- Institut national d'excellence en santé et en services sociaux (INESSS) [www.inesss.qc.ca/](http://www.inesss.qc.ca/) \*scanned list of projects in progress & published reports back to 2007
- Canadian Agency for Drugs and Technologies in Health (CADTH) [www.cadth.ca](http://www.cadth.ca) \*sleep
- Institute for Clinical and Evaluative Sciences (ICES) [www.ices.on.ca](http://www.ices.on.ca) \*sleep
- Institute of Health Economics [www.ihe.ca](http://www.ihe.ca) \*sleep
- McGill University Health Centre Technology Assessment Unit <http://www.mcgill.ca/tau/publications/>  
\*scanned list of reports (2007-2012)
- Ontario Health Technology Advisory Committee (OHTAC) & Ontario Medical Advisory Secretariat (MAS) [http://www.health.gov.on.ca/english/providers/program/ohtac/tech/recommend/rec\\_mn.html](http://www.health.gov.on.ca/english/providers/program/ohtac/tech/recommend/rec_mn.html)  
\*scanned list of reports & recommendations (2007-2012)

## Other

- New York Academy of Medicine Grey Literature collection  
[http://www.nyam.org/library/pages/grey\\_literature\\_report](http://www.nyam.org/library/pages/grey_literature_report)
- Google [www.google.ca](http://www.google.ca) sleep AND (apnoea\* OR apnea\* OR "disorder\*") AND (algorithm OR diagnosis OR polysomnograph\*)
