# Supplementary material
Source: PubMed Central journal article supplement (PMC3883848)
Supplement: supp_130952_sleep-topfner-2-at.pdf [file supp_130952_sleep-topfner-2-at.pdf]

**Appendix 2 (as supplied by the authors): PICOS criteria for inclusion and exclusion of studies**

| <b>Parameter</b>    | <b>Inclusion criteria</b>                                                                                                                                                                                                                                                                             | <b>Exclusion criteria</b>                                                  |
|---------------------|-------------------------------------------------------------------------------------------------------------------------------------------------------------------------------------------------------------------------------------------------------------------------------------------------------|----------------------------------------------------------------------------|
| <i>Patients</i>     | Adults $\geq 18$ years with suspected SDB requiring confirmation of diagnosis for treatment<br>Adults with or without comorbidities potentially related to SDB                                                                                                                                        | Adults with previous SDB-related surgery<br>Patients under 18 years of age |
| <i>Intervention</i> | Level-3 sleep study                                                                                                                                                                                                                                                                                   |                                                                            |
| <i>Comparator</i>   | Level-1 sleep study                                                                                                                                                                                                                                                                                   |                                                                            |
| <i>Outcomes</i>     | Diagnostic accuracy<br>Any disease management outcomes (e.g. acceptance of CPAP treatment, adherence to CPAP treatment, residual AHI and mean CPAP pressure, difference in functional status or quality of life).<br>Adverse effects or complications related to the use of Level-3 and Level-1 tests | Studies without defined clinical outcomes                                  |
| <i>Study Design</i> | Randomized controlled trials<br>Non-randomized controlled trials<br>Retrospective, prospective, or concurrent cohort studies<br>Cross sectional studies                                                                                                                                               | Case reports<br>Editorials & opinion pieces                                |

CPAP = continuous positive airway pressure; PICOS = patients, intervention, comparator, outcomes, study design; SDB = sleep disordered breathing
