# Supplementary material
Source: PubMed Central journal article supplement (PMC3883848)
Supplement: supp_130952_sleep-topfner-3-at.pdf [file supp_130952_sleep-topfner-3-at.pdf]

### Appendix 3 (as supplied by the author): Patient characteristics

| Study                                | N   | Recruit-<br>ment<br>diagnosis | Male | Female | Age<br>mean<br>(SD/<br>range)           | BMI<br>mean<br>(SD/<br>range)                                  | Neck<br>circum-<br>ference | ESS<br>mean<br>(SD/<br>range)     | Berlin<br>risk<br>score | Comorbidities                                                                                                                                         |
|--------------------------------------|-----|-------------------------------|------|--------|-----------------------------------------|----------------------------------------------------------------|----------------------------|-----------------------------------|-------------------------|-------------------------------------------------------------------------------------------------------------------------------------------------------|
| Abraham et al. <sup>(1)</sup>        | 50  | SDB                           | 34   | 16     | 55.5 yrs<br>(±12.8)<br>(23-78)          | 32.6 kg/m <sup>2</sup><br>(±6.5)<br>(19-40 kg/m <sup>2</sup> ) | -                          | 10.6<br>(±4.4)<br>(1-23)          | -                       | All patients are stable CHF, NYHA class III heart failure<br>Ischemic heart failure: 23<br>Dilated heart failure: 21<br>Hypertrophic heart failure: 2 |
| Alonso-Alvarez et al. <sup>(2)</sup> | 45  | OSA                           | 39   | 6      | 52.3 yrs<br>(±11)                       | 28.7 kg/m <sup>2</sup><br>(±4)                                 | 40.2 cm<br>(2)             | 8.9<br>(3)<br>(0-19)              | -                       | Hypertension: 8<br>Arrhythmias: 5<br>Heart disease: 3<br>Cardiovascular accident: 2<br>COPD: 1<br>Asthma: 1                                           |
| Amir et al. <sup>(3)</sup>           | 53* | OSA                           | 36   | 17     | 47.79 yrs<br>(±11.3)                    | 32.04 kg/m <sup>2</sup><br>(±7.9)                              | -                          | -                                 | -                       | -                                                                                                                                                     |
| Andreu et al. <sup>(4)</sup>         | 65* | OSAS                          | 54   | 11     | 52 yrs<br>(10)                          | 34.0 kg/m <sup>2</sup><br>(7)                                  | 45.5 cm<br>(3.5)           | -                                 | -                       | Hypertension: 32                                                                                                                                      |
| Askenov et al. <sup>(5)</sup> †      | 452 | OSA                           | -    | -      | 59.1 yrs<br>(-)                         | 34.7 kg/m <sup>2</sup><br>(-)                                  | -                          | 14.03<br>(-)                      | -                       | -                                                                                                                                                     |
| Ayappa et al. <sup>(6)</sup>         | 97* | SDB                           | 69   | 28     | 44.0 yrs<br>(19-74)                     | 28.7 kg/m <sup>2</sup><br>(19-70 kg/m <sup>2</sup> )           | -                          | 8.7                               | -                       | -                                                                                                                                                     |
| Bajwa et al. <sup>(7)</sup> †        | 7   | OSA                           | -    | -      | -                                       | -                                                              | -                          | -                                 | -                       | -                                                                                                                                                     |
| Berry et al. <sup>(8)</sup>          | 106 | OSA                           | 93   | 13     | 53.5 yrs<br>(pooled)                    | 34.2 kg/m <sup>2</sup><br>(pooled)                             | -                          | 16.4<br>(pooled)                  | -                       | -                                                                                                                                                     |
| Bridevaux et al. <sup>(9)</sup> †    | 11  | OSAS                          | -    | -      | 54 yrs<br>(±14)                         | -                                                              | -                          | -                                 | -                       | -                                                                                                                                                     |
| Campbell et al. <sup>(10)</sup>      | 31  | OSA                           | 24   | 6      | 49.1 yrs<br>(±13.8)<br>Range<br>(23-78) | 31 kg/m <sup>2</sup><br>(±6.1)                                 | -                          | 10.8<br>(±4.9)<br>Range<br>(0-20) | -                       | -                                                                                                                                                     |

|                                        |     |      |    |    |                            |                                                         |                          |                   |                       |                                                         |
|----------------------------------------|-----|------|----|----|----------------------------|---------------------------------------------------------|--------------------------|-------------------|-----------------------|---------------------------------------------------------|
| Candela et al. <sup>(11)</sup>         | 92* | SRBD | 72 | 20 | 52.3 yrs (±11.8) (24-77)   | 31.8 kg/m <sup>2</sup> (6.6) (22-59 kg/m <sup>2</sup> ) | 41.2 cm (3.6) (33-50 cm) | 11.2 (4.8) (2-22) | -                     | Hypertension: 37<br>COPD: 8                             |
| Cheliout-Heraut et al. <sup>(12)</sup> | 83* | OSA  | 60 | 30 | 55.4 yrs (±8.7) (47-70)    | -                                                       | -                        | -                 | -                     | -                                                       |
| Chung et al. <sup>(13)</sup>           | 21* | OSA  | 11 | 10 | 54 yrs (±11)               | 36 kg/m <sup>2</sup> (±9)                               | -                        | -                 | -                     | -                                                       |
| Churchward et al. <sup>(14)</sup>      | 20  | OSA  | 16 | 4  | 50.0 yrs (13)              | 34.0 kg/m <sup>2</sup> (8.3)                            | -                        | -                 | -                     | -                                                       |
| Cilli et al. <sup>(15)</sup>           | 55  | OSA  | 49 | 6  | 46.0 yrs (-)               | -                                                       | -                        | -                 | -                     | -                                                       |
| Danzi-Soares et al. <sup>(16)</sup>    | 70* | OSAS | 53 | 17 | 58 yrs (±7)                | 27.6 kg/m <sup>2</sup> (25.8, 31.1)                     | 40 cm (37.4-42.0)        | 7 (5-11)          | 49 patients high risk | All patients have coronary artery disease               |
| Divo et al. <sup>(17)</sup>            | 14  | SDB  | 12 | 2  | 52.7 (±14.3)               | -                                                       | -                        | -                 | -                     | -                                                       |
| Driver et al. <sup>(18)</sup>          | 73* | OSA  | 30 | 43 | 53.0 yrs (±12) (20-71 yrs) | 32.2 kg/m <sup>2</sup> (±6.8)                           | -                        | -                 | -                     | -                                                       |
| Ferre et al. <sup>(19)</sup>           | 37  | SDB  | 24 | 13 | 55.1 yrs (11.5)            | 27.3 kg/m <sup>2</sup> (3.9)                            | -                        | 10.0 (8)          | -                     | -                                                       |
| Finkel et al. <sup>(20)</sup> †        | 26  | OSA  | -  | -  | -                          | -                                                       | -                        | -                 | -                     | -                                                       |
| Fordyce et al. <sup>(21)</sup>         | 9   | OSA  | 6  | 3  | 40.3 yrs (-)               | 25.4 kg/m <sup>2</sup> (-)                              | 38.2 cm (-)              | -                 | -                     | -                                                       |
| Furokawa et al. <sup>(22)</sup>        | 74* | SDB  | 51 | 30 | 64.9 yrs (±9.6)            | 25.9 kg/m <sup>2</sup> (±4.3)                           | -                        | 6.5 (±4.1)        | -                     | All patients enrolled are hypertensive                  |
| Garcia-Diaz et al. <sup>(23)</sup>     | 62* | SAHS | 54 | 8  | 54.0 yrs (±10.4)           | 30.1 kg/m <sup>2</sup> (±3.9)                           | -                        | 12 (±3.7)         | -                     | Hypertension: 27<br>Other cardiovascular comorbidity: 9 |
| Gjevre et al. <sup>(24)</sup>          | 47  | OSA  | 0  | 47 | 52 yrs (±11)               | 34.86 kg/m <sup>2</sup> (±9.04)                         | -                        | 9.64 (±4.44)      | 31 high risk          | -                                                       |
| Goodrich et al. <sup>(25)</sup>        | 48* | OSA  | 35 | 13 | 44 yrs (22-69)             | -                                                       | -                        | -                 | -                     | -                                                       |
| Grant et al. <sup>(26)</sup> †         | 95  | SA   | -  | -  | -                          | -                                                       | -                        | -                 | -                     | -                                                       |
| Grover et al. <sup>(27)</sup> †        | 5   | SRBD | -  | -  | - (29-59 yrs)              | -                                                       | -                        | -                 | -                     | -                                                       |
| Hernandez et al. <sup>(28)</sup>       | 88  | SAHS | 71 | 17 | 50.3 yrs (11.6)            | 29.6 kg/m <sup>2</sup> (4.2)                            | -                        | -                 | -                     | -                                                       |

|                                         |      |      |     |     |                     |                                   |                  |                 |   |                                                                                                                      |
|-----------------------------------------|------|------|-----|-----|---------------------|-----------------------------------|------------------|-----------------|---|----------------------------------------------------------------------------------------------------------------------|
| Kuna et al. <sup>(29)</sup>             | 39   | OSA  | 39  | 0   | 54.0 yrs<br>(±9.6)  | 35.8 kg/m <sup>2</sup><br>(±7)    | -                | -               | - | -                                                                                                                    |
| Kuna et al. <sup>(30)</sup>             | 284* | OSA  | 275 | 15  | 53.5 yrs<br>pooled  | 34.5 kg/m <sup>2</sup><br>pooled  | -                | -               | - | -                                                                                                                    |
| Kushida et al. <sup>(31)</sup>          | 11   | OSA  | 7   | 4   | 42.1 yrs<br>(-)     | 26.1 kg/m <sup>2</sup><br>(-)     | -                | 8.1<br>(-)      | - | -                                                                                                                    |
| Lettieri et al. <sup>(32)†</sup>        | 210  | OSA  | -   | -   | -                   | -                                 | -                | -               | - | -                                                                                                                    |
| Levendowski et al. <sup>(33)†</sup>     | 37   | OSA  | -   | -   | -                   | -                                 | -                | -               | - | -                                                                                                                    |
| Masa et al. <sup>(34)</sup>             | 348* | SAHS | 263 | 85  | 48.7 yrs<br>(±11.8) | 31 kg/m <sup>2</sup><br>(±6.6)    | -                | 11.6<br>(±5.5)  | - | Smokers: 87<br>Cardiac disease: 135<br>Cerebrovascular disease: 7<br>Hypertension: 112<br>Depression and anxiety: 85 |
| Masdeu et al. <sup>(35)</sup>           | 85   | OSA  | 61  | 24  | 42.4 yrs<br>(27-74) | 29 kg/m <sup>2</sup><br>(21-70)   | -                | -               | - | -                                                                                                                    |
| Nakayama et al. <sup>(36)</sup>         | 292* | OSA  | 322 | 0   | 43.8 yrs<br>(±8.4)  | 23.7 kg/m <sup>2</sup><br>(±3.1)  | -                | 8.1<br>(±4.3)   | - | Hypertension: 50                                                                                                     |
| Ng et al. <sup>(37)</sup>               | 80*  | OSAS | 63  | 17  | 51.4 yrs<br>(11.9)  | 27.1 kg/m <sup>2</sup><br>(4.2)   | 38.6 cm<br>(3.6) | 9.7<br>(5.3)    | - | -                                                                                                                    |
| Ng et al. <sup>(38)</sup>               | 50   | OSAS | 44  | 6   | 50 yrs<br>(±11.8)   | 27.9 kg/m <sup>2</sup><br>(±4.8)  | -                | 10.1<br>(±5.5)  | - | -                                                                                                                    |
| Nigro et al. <sup>(39)</sup>            | 66*  | OSA  | 47  | 19  | 51.5 yrs<br>(±14.1) | 29.3 kg/m <sup>2</sup><br>(±5.4)  | -                | -               | - | -                                                                                                                    |
| Onder et al. <sup>(40)</sup>            | 56*  | OSA  | 36  | 20  | 42 yrs<br>pooled    | 30.5 kg/m <sup>2</sup><br>pooled  | -                | -               | - | -                                                                                                                    |
| Orr et al. <sup>(41)†</sup>             | 48   | -    | -   | -   | -                   | -                                 | -                | -               | - | -                                                                                                                    |
| Polese et al. <sup>(42)</sup>           | 43   | OSA  | 19  | 24  | 70.0 yrs<br>(±5)    | 30.0 kg/m <sup>2</sup><br>(±6)    | -                | 9.0<br>(±7)     | - | -                                                                                                                    |
| Quintana-Gallego et al. <sup>(43)</sup> | 75*  | SDB  | 65  | 10  | 56.1 yrs<br>(±11.7) | 28.6 kg/m <sup>2</sup><br>(±4.4)  | -                | -               | - | CHF/Ischemic heart failure: 32<br>Idiopathic heart disease: 30<br>Heart failure due to other reasons: 14             |
| Rosen et al. <sup>(44)</sup>            | 197* | OSA  | 225 | 148 | 45.9 yrs<br>pooled  | 37.25 kg/m <sup>2</sup><br>pooled | -                | 14.25<br>pooled | - | -                                                                                                                    |

|                                         |      |      |     |    |                         |                                                                                |                |              |                               |                                                                                                                                                               |
|-----------------------------------------|------|------|-----|----|-------------------------|--------------------------------------------------------------------------------|----------------|--------------|-------------------------------|---------------------------------------------------------------------------------------------------------------------------------------------------------------|
| Santos-Silva et al. <sup>(45)</sup>     | 82   | OSA  | 46  | 34 | 47.0 yrs (±14)          | 28.0 kg/m <sup>2</sup> (±5)                                                    | 36.6 cm (±4.9) | 10.4 (±5.8)  | Low risk: 26<br>High risk: 54 | -                                                                                                                                                             |
| Shrivastava et al. <sup>(46)</sup>      | 99   | SDB  | -   | -  | -                       | -                                                                              | -              | -            | -                             | -                                                                                                                                                             |
| Skomro et al. <sup>(47)</sup><br>Canada | 33   | OSA  | 27  | 6  | 48.3 yrs (13.1)         | -                                                                              | -              | 11.7 (4.2)   | -                             | -                                                                                                                                                             |
| Skomro et al. <sup>(48)</sup>           | 102  | OSA  | 60  | 29 | 48.8 yrs pooled         | 33 kg/m <sup>2</sup>                                                           | -              | 12.65 pooled | -                             | -                                                                                                                                                             |
| Smith et al. <sup>(49)</sup>            | 20   | SDB  | 14  | 6  | 61.0 yrs (18-80)        | 29.0 kg/m <sup>2</sup> (±6)                                                    | -              | 8.0 (±4)     | -                             | CHF/Ischemic heart disease: 13<br>Dilated cardiomyopathy: 7<br>Atrial fibrillation: 3                                                                         |
| Su et al. <sup>(50)</sup>               | 60   | OSAS | 25  | 35 | 45.2 yrs (12.3) (19-74) | 35.6 kg/m <sup>2</sup> (10.1) (16.9-60.7 kg/m <sup>2</sup> )                   | -              | -            | -                             | Hypertension?                                                                                                                                                 |
| Sullivan et al. <sup>(51)†</sup>        | 34   | -    | -   | -  | -                       | -                                                                              | -              | -            | -                             | -                                                                                                                                                             |
| Takama et al. <sup>(52)</sup>           | 83*  | SDB  | 48  | 35 | 70 yrs (±10)            | 26.1 kg/m <sup>2</sup> (pooled) for only reported moderate and severe patients | -              | -            | -                             | Hypertension: 75<br>Dyslipidaemia: 66<br>Diabetes: 45<br>Coronary artery disease: 38<br>Valvular disease: 16<br>Cardiomyopathy: 16<br>Other comorbidities: 13 |
| Tiihonen et al. <sup>(53)</sup>         | 19   | SA   | 11  | 8  | 46.8 yrs. (±12.7)       | 31.4 kg/m <sup>2</sup> (±10.3)                                                 | -              | -            | -                             | -                                                                                                                                                             |
| Tiihonen et al. <sup>(54)</sup>         | 10   | OSA  | 5   | 5  | 46.7 yrs (±12.6)        | 37.3 kg/m <sup>2</sup> (±10.5)                                                 | -              | -            | -                             | -                                                                                                                                                             |
| To et al. <sup>(55)</sup>               | 141* | OSAS | 132 | 43 | 48.9 yrs (-)            | 28.7 kg/m <sup>2</sup> (-)                                                     | -              | 10.4 (-)     | -                             | Hypertension: 85<br>Diabetes: 27<br>Hyperlipidaemia: 25<br>Fatty liver: 15<br>Cerebrovascular accident: 11                                                    |

|                                            |             |      |             |             |                               |                                                              |                        |                        |   |                     |
|--------------------------------------------|-------------|------|-------------|-------------|-------------------------------|--------------------------------------------------------------|------------------------|------------------------|---|---------------------|
| Tonelli de Oliveria et al. <sup>(56)</sup> | 149*        | OSAS | 111         | 38          | 45.0 yrs<br>(±12)             | 29.2 kg/m <sup>2</sup><br>(±5.5)                             | -                      | 11.0<br>(±5)           | - | Hypertension:<br>47 |
| To et al. <sup>(57)</sup>                  | 371         | OSA  | 274         | 97          | 50.2 yrs<br>pooled            | 29 kg/m <sup>2</sup><br>pooled                               | -                      | 14.1<br>pooled         | - | -                   |
| Yagi et al. <sup>(58)</sup>                | 22          | SAS  | 17          | 5           | 52.9 yrs<br>(13.3)<br>(31-74) | 25.7 kg/m <sup>2</sup><br>(4.4)<br>(19-39kg/m <sup>2</sup> ) | -                      | -                      | - | -                   |
| Yin et al. <sup>(59)</sup>                 | 44*         | OSA  | 40          | 4           | 52.3 yrs<br>(13.5)            | 26.7 kg/m <sup>2</sup><br>(5.3)                              | -                      | -                      | - | -                   |
| <b>Total</b>                               | <b>5026</b> | -    | <b>3169</b> | <b>1077</b> | <b>50.8<br/>pooled</b>        | <b>30.4<br/>pooled</b>                                       | <b>41.1<br/>pooled</b> | <b>11.6<br/>pooled</b> | - | <b>1382</b>         |

BMI = body mass index; CHF = congestive heart failure; COPD = chronic obstructive pulmonary disease; ESS = Epworth Sleepiness Scale; NYHA = New York Heart Association; OSA = obstructive sleep apnea; OSAS = obstructive sleep apnea syndrome; SA = sleep apnea; SAS = sleep apnea syndrome; SAHS = sleep apnea hypopnea syndrome; SD = standard deviation; SDB = sleep disordered breathing; SRBD = sleep related breathing disorder

## References

- (1) Abraham WT, Trupp RJ, Phillips B, Bourge RC, Bailey B, Harding SM, et al. Validation and clinical utility of a simple in-home testing tool for sleep-disordered breathing and arrhythmias in heart failure: results of the Sleep Events, Arrhythmias, and Respiratory Analysis in Congestive Heart Failure (SEARCH) study. *Congest Heart Fail* 2006;12(5):241-7.
- (2) Alonso Alvarez MD, Santos JT, Guevara JC, Martinez MG, Pascual LR, Banuelos JL, et al. Reliability of home respiratory polygraphy for the diagnosis of sleep apnea-hypopnea syndrome: analysis of costs. *Archivos de Bronconeumologia* 2008;44(1):22-8.
- (3) Amir O, Barak-Shinar D, Amos Y, MacDonald M, Pittman S, White DP. An automated sleep-analysis system operated through a standard hospital monitor. *J Clin Sleep Med* 2010;6(1):59-63.
- (4) Andreu AL, Chiner E, Sancho-Chust JN, Pastor E, Llombart M, Gomez-Merino E, et al. Effect of an ambulatory diagnostic and treatment programme in patients with sleep apnoea. *Eur Respir J* 2012;39(2):305-12.
- (5) Aksenov IV, Foster C, Berry RB. Management of obstructive sleep apnea: portable monitoring for diagnosis followed by treatment with auto-adjusting positive airway pressure [abstract]. *Sleep* 2009;32(Suppl):A183-Abstract no. 0557.
- (6) Ayappa I, Norman RG, Seelall V, Rapoport DM. Validation of a self-applied unattended monitor for sleep disordered breathing. *J Clin Sleep Med* 2008;4(1):26-37.
- (7) Bajwa I, Grover S, Clawson T, Cady M. Validity of respiratory events collected from a portable monitoring device [abstract]. *Sleep* 2009;32(Suppl):A376 (Abstract no. 1150).

Appendix to: El Shayeb M, Topfer LA, Stafinski T, et al. A comparison of level 3 portable sleep tests to level 1 polysomnography in the diagnosis of sleep-disordered breathing: a systematic review and meta-analysis. *CMAJ* 2013; DOI:10.1503/cmaj.130952.

- (8) Berry RB, Hill G, Thompson L, McLaurin V. Portable monitoring and autotitration versus polysomnography for the diagnosis and treatment of sleep apnea. *Sleep* 2008;31(10):1423-31.
- (9) Bridevaux PO, Fitting JW, Fellrath JM, Aubert JD. Inter-observer agreement on apnoea hypopnoea index using portable monitoring of respiratory parameters. *Swiss Med Wkly* 2007;137(43-44):602-7.
- (10) Campbell AJ, Neill AM. Home set-up polysomnography in the assessment of suspected obstructive sleep apnea. *J Sleep Res* 2011;20(1 Pt 2):207-13.
- (11) Candela A, Hernandez L, Asensio S, Sanchez-Paya J, Vila J, Benito N, et al. Validation of a respiratory polygraphy system in the diagnosis of sleep apnea syndrome. *Arch Bronconeumol* 2005;41(2):71-7.
- (12) Cheliout-Heraut F, Senny F, Djouadi F, Ouayoun M, Bour F. Obstructive sleep apnoea syndrome: comparison between polysomnography and portable sleep monitoring based on jaw recordings. *Neurophysiol Clin* 2011;41(4):191-8.
- (13) Chung F, Liao P, Sun Y, Amirshahi B, Fazel H, Shapiro CM, et al. Perioperative practical experiences in using a level 2 portable polysomnography. *Sleep Breath* 2011;15(3):367-75.
- (14) Churchward TJ, O'Donoghue F, Rochford P, Pierce RJ, Barnes M, Higgins S. Diagnostic accuracy and cost effectiveness of home-based PSG in OSA [abstract]. *Sleep Biol Rhythms* 2006;4(Suppl):A11 (Abstract no. 0-11).
- (15) Cilli A, Erogullari I, Turhan M, Ozbudak O, Ozdemir T, Dinc O. Comparison of Embletta portable device versus Embla for diagnosing the obstructive sleep apnea [abstract]. *J Sleep Res* 2006;15(Suppl 1):152.
- (16) Danzi-Soares NJ, Genta PR, Nerbass FB, Pedrosa RP, Soares FS, Cesar LA, et al. Obstructive sleep apnea is common among patients referred for coronary artery bypass grafting and can be diagnosed by portable monitoring. *Coron Artery Dis* 2012;23(1):31-8.
- (17) Morales Divo C., Selivanova O, Mewes T, Gosepath J, Lippold R, Mann WJ. Polysomnography and ApneaGraph in patients with sleep-related breathing disorders. *ORL J Otorhinolaryngol Relat Spec* 2009;71(1):27-31.
- (18) Driver HS, Pereira EJ, Bjerring K, Toop F, Stewart SC, Munt PW, et al. Validation of the MediByte(R) type 3 portable monitor compared with polysomnography for screening of obstructive sleep apnea. *Can Respir J* 2011;18(3):137-43.

- (19) Ferre A, Grau M, Jurado M, Romero O, Saheb A, Bartolome M, et al. Evaluation of a new simplified polysomnography system for the diagnosis of sleep disordered breathing [abstract]. *J Sleep Res* 2008;17(Suppl 1):234 (Abstract no. P441).
- (20) Finkel KJ, Searleman AC, Tymkew H, Tanaka CY, Saager L, Safer-Zadeh E, et al. Prevalence of undiagnosed obstructive sleep apnea among adult surgical patients in an academic medical center. *Sleep Med* 2009;10(7):753-8.
- (21) Fordyce L, Samuels CH, Oram C, Wallins B. A retrospective, observational study showing patients with a normal level III sleep study and normal OSA pretest probability factors may still require additional investigations [abstract]. *Vigilance* 2009;19(Suppl):(Abstract no. P075).
- (22) Furukawa T, Suzuki M, Funatogawa I, Isshiki T, Miyazawa Y, Teramoto T, et al. Screening method for severe sleep-disordered breathing in hypertensive patients without daytime sleepiness. *J Cardiol* 2009;53(1):79-85.
- (23) Garcia-Diaz E, Quintana-Gallego E, Ruiz A, Carmona-Bernal C, Sanchez-Armengol A, Botbol-Benhamou G, et al. Respiratory polygraphy with actigraphy in the diagnosis of sleep apnea-hypopnea syndrome. *Chest* 2007;131(3):725-32.
- (24) Gjevre JA, Taylor-Gjevre RM, Skomro R, Reid J, Fenton M, Cotton D. Comparison of polysomnographic and portable home monitoring assessments of obstructive sleep apnea in Saskatchewan women. *Can Respir J* 2011;18(5):271-4.
- (25) Goodrich S, Orr WC. An investigation of the validity of the Lifeshirt in comparison to standard polysomnography in the detection of obstructive sleep apnea. *Sleep Med* 2009;10(1):118-22.
- (26) Grant B. Diagnostic accuracy of home sleep studies for sleep apnea [abstract]. *Sleep* 2009;32(Suppl):A232 (Abstract no. 713).
- (27) Grover S, Cady M. A user-friendly device for home monitoring of sleep disorders [abstract]. *Sleep* 2009;32(Suppl):A371 (Abstract no. 1136).
- (28) Hernandez L, Torrella M, Roger N, Llunell A, Ballester E, Quinto L, et al. Management of sleep apnea: concordance between nonreference and reference centers. *Chest* 2007;132(6):1853-7.
- (29) Kuna ST, Seeger T, Brendel M. Intra-subject comparison of polysomnography and a type 3 portable monitor [abstract]. *Sleep* 2005;28(Suppl):A324 (Abstract no. 0956).

- (30) Kuna ST, Gurubhagavatula I, Maislin G, Hin S, Hartwig KC, McCloskey S, et al. Noninferiority of functional outcome in ambulatory management of obstructive sleep apnea. *Am J Respir Crit Care Med* 2011;183(9):1238-44.
- (31) Kushida CA, Cardell C, Black S, Khouzam A. Comparison of a new type 3 portable monitor for OSA detection vs. in-lab polysomnography [abstract]. *Sleep* 2009;32(Suppl):A385 (Abstract no. 1178).
- (32) Lettieri CF, Lettieri CJ, Carter K. Does home sleep testing impair continuous positive airway pressure adherence in patients with obstructive sleep apnea? *Chest* 2011;139(4):849-54.
- (33) Levendowski D, Steward D, Woodson BT, Olmstead R, Popovic D, Westbrook P. The impact of obstructive sleep apnea variability measured in-lab versus in-home on sample size calculations. *Int Arch Med* 2009;2(1):2.
- (34) Masa JF, Corral J, Pereira R, Duran-Cantolla J, Cabello M, Hernandez-Blasco L, et al. Therapeutic decision-making for sleep apnea and hypopnea syndrome using home respiratory polygraphy: a large multicentric study. *Am J Respir Crit Care Med* 2011;184(8):964-71.
- (35) Masdeu MJ, Ayappa I, Hwang D, Mooney AM, Rapoport DM. Impact of clinical assessment on use of data from unattended limited monitoring as opposed to full-in lab PSG in sleep disordered breathing. *J Clin Sleep Med* 2010;6(1):51-8.
- (36) Nakayama-Ashida Y, Takegami M, Chin K, Sumi K, Nakamura T, Takahashi K, et al. Sleep-disordered breathing in the usual lifestyle setting as detected with home monitoring in a population of working men in Japan. *Sleep* 2008;31(3):419-25.
- (37) Ng SS, Chan TO, To KW, Ngai J, Tung A, Ko FW, et al. Validation of Embletta portable diagnostic system for identifying patients with suspected obstructive sleep apnoea syndrome (OSAS). *Respirology* 2010;15(2):336-42.
- (38) Ng SS, Chan TO, To KW, Ngai J, Tung A, Ko FW, et al. Validation of a portable recording device (ApneaLink) for identifying patients with suspected obstructive sleep apnoea syndrome. *Intern Med J* 2009;39(11):757-62.
- (39) Nigro CA, Serrano F, Aimaretti S, Gonzalez S, Codinardo C, Rhodius E. Utility of ApneaLink for the diagnosis of sleep apnea-hypopnea syndrome. *Medicina (B Aires)* 2010;70(1):53-9.
- (40) Onder NS, Akpınar ME, Yigit O, Gor AP. Watch peripheral arterial tonometry in the diagnosis of obstructive sleep apnea: Influence of aging. *Laryngoscope* 2012.



- (41) Orr WC, Goodrich S. An investigation of the accuracy of the Lifeshirt in comparison to standard polysomnography [abstract]. *Sleep* 2006;29(Suppl):A348 (Abstract no. 1020).
- (42) Polese JF, Santos SR, Sartori DE, Carlos VA, Kobayashi RF, Ferrari PMP, et al. Validation of a portable monitoring system for the diagnosis of obstructive sleep apnea in elderly patients [abstract]. *Sleep Medicine* 2009;10(Suppl 2):S22 (Abstract no. 078).
- (43) Quintana-Gallego E, Villa-Gil M, Carmona-Bernal C, Botebol-Benhamou G, Martinez-Martinez A, Sanchez-Armengol A, et al. Home respiratory polygraphy for diagnosis of sleep-disordered breathing in heart failure. *Eur Respir J* 2004;24(3):443-8.
- (44) Rosen CL, Auckley D, Benca R, Foldvary-Schaefer N, Iber C, Kapur V, et al. A multisite randomized trial of portable sleep studies and positive airway pressure autotitration versus laboratory-based polysomnography for the diagnosis and treatment of obstructive sleep apnea: the HomePAP Study. *Sleep* 2012;35(6):757-67.
- (45) Santos-Silva R, Sartori DE, Truksinas V, Truksinas E, Alonso FF, Tufik S, et al. Validation of a portable monitoring system for the diagnosis of obstructive sleep apnea syndrome. *Sleep* 2009;32(5):629-36.
- (46) Shrivastava D, Aurora NR, Gathoo M, Hardin K. Home diagnostic portable monitoring: an effective screening tool in a community-based primary care population [abstract]. *Sleep* 2006;29(Suppl):A192 (Abstract no. 565).
- (47) Skomro R, Cotton D, Gjevre J, Hill F, King L, Mink J, et al. Diagnosis of obstructive sleep apnea using unattended level III monitoring [abstract]. *Sleep* 2005;28(Suppl):A164 (Abstract no. 0483).
- (48) Skomro RP, Gjevre J, Reid J, McNab B, Ghosh S, Stiles M, et al. Outcomes of home-based diagnosis and treatment of obstructive sleep apnea. *Chest* 2010;138(2):257-63.
- (49) Smith LA, Chong DW, Vennelle M, Denvir MA, Newby DE, Douglas NJ. Diagnosis of sleep-disordered breathing in patients with chronic heart failure: evaluation of a portable limited sleep study system. *J Sleep Res* 2007;16(4):428-35.
- (50) Su S, Baroody FM, Kohrman M, Suskind D. A comparison of polysomnography and a portable home sleep study in the diagnosis of obstructive sleep apnea syndrome. *Otolaryngol Head Neck Surg* 2004;131(6):844-50.
- (51) Sullivan GE, Morehouse R, Savoy A. Comparison of synchronized level 1 and level 3 sleep studies [abstract]. *Vigilance* 2009;19(Suppl):(Abstract no. P074).

- (52) Takama N, Kurabayashi M. Effectiveness of a portable device and the need for treatment of mild-to-moderate obstructive sleep-disordered breathing in patients with cardiovascular disease. *J Cardiol* 2010;56(1):73-8.
- (53) Tiihonen P, Paakkonen A, Mervaala E, Hukkanen T, Toyras J. Design, construction and evaluation of an ambulatory device for screening of sleep apnea. *Med Biol Eng Comput* 2009;47(1):59-66.
- (54) Tiihonen P, Hukkanen T, Tuomilehto H, Mervaala E, Toyras J. Evaluation of a novel ambulatory device for screening of sleep apnea. *Telemed J E Health* 2009;15(3):283-9.
- (55) To KW, Chan WC, Chan TO, Tung A, Ngai J, Ng S, et al. Validation study of a portable monitoring device for identifying OSA in a symptomatic patient population. *Respirology* 2009;14(2):270-5.
- (56) Tonelli de Oliveira AC, Martinez D, Vasconcelos LF, Goncalves SC, Lenz MC, Fuchs SC, et al. Diagnosis of obstructive sleep apnea syndrome and its outcomes with home portable monitoring. *Chest* 2009;135(2):330-6.
- (57) To KW, Chan WC, Chan TO, Ngai J, Tung A, Ng S, et al. Comparison of empirical continuous positive airway pressure (CPAP) treatment versus initial portable sleep monitoring followed by CPAP treatment for patients with suspected obstructive sleep apnoea. *Intern Med J* 2012;42(6):e107-e114.
- (58) Yagi H, Nakata S, Tsuge H, Yasuma F, Noda A, Morinaga M, et al. Significance of a screening device (Apnomonitor 5) for sleep apnea syndrome. *Auris Nasus Larynx* 2009;36(2):176-80.
- (59) Yin M, Miyazaki S, Ishikawa K. Evaluation of type 3 portable monitoring in unattended home setting for suspected sleep apnea: factors that may affect its accuracy. *Otolaryngol Head Neck Surg* 2006;134(2):204-9.
